1 **Experimental system and image analysis software for high throughput phenotyping of**  
2 **mycorrhizal growth response in *Brachypodium distachyon***

3 Felicia Maviane-Macia<sup>1</sup>, Camille Ribeyre<sup>1</sup>, Luis Buendia<sup>1</sup>, Mégane Gaston<sup>1</sup>, Mehdi Khafif<sup>1</sup>,  
4 Fabrice Devoilles<sup>1</sup> Nemo Peeters<sup>1,2\*</sup>, Benoit Lefebvre<sup>1,2\*</sup>

5 <sup>1</sup>LIPM, Université de Toulouse, INRA, CNRS, Castanet-Tolosan, France

6 <sup>2</sup>These authors contributed equally to this work

7 \*authors for correspondence, e-mail: benoit.lefebvre@inra.fr; telephone 0033+(0) 5 61 28  
8 53 22, nemo.peeters@inra.fr; telephone 0033+(0) 5 61 28 55 92

9

10 ORCID:

11 Felicia Maviane-Macia : 0000-0002-4217-7707

12 Luis Buendia: 0000-0002-9511-6334

13 Nemo Peeters: 0000-0002-1802-0769

14 Benoit Lefebvre: 0000-0002-3810-605X

15

16 Total word count for the main body of the text: 4805 words

17 Introduction: 727 words

18 Results: 1549 words

19 Discussion: 1843 words

20 Materials and methods: 665 words

21 5 figures(2 colour figures: fig. 1 and 2)

22 7 supplementary figures + 2 supplementary files

23

24

25 **Abstract**

- 26 • Plant growth response to Arbuscular Mycorrhizal (AM) fungi is variable and depends on  
27 genetic and environment factors that still remain largely unknown. Identification of these  
28 factors can be envisaged using high-throughput and accurate plant phenotyping.
- 29 • We setup experimental conditions based on a two-compartment system allowing to  
30 measure *Brachypodium distachyon* mycorrhizal growth response (MGR) in an automated  
31 phenotyping greenhouse. We developed a new image analysis software “*IPSO Phen*” to  
32 estimate of *B. distachyon* aboveground biomass.
- 33 • We found a positive MGR in the *B. distachyon* Bd3-1 genotype inoculated with the AM  
34 fungi *Rhizophagus irregularis* only if nitrogen and phosphorus were added together in the  
35 compartment restricted to AM fungi. Using this condition, we found genetic diversity in *B.*  
36 *distachyon* for MGR ranging from positive to negative MGR depending on the plant  
37 genotype tested.
- 38 • Our result on the interaction between nitrogen and phosphorus for MGR in *B. distachyon*  
39 opens new perspectives about AM functioning. In addition, our open-source software  
40 allowing to test and run image analysis parameters on large amount of images generated  
41 by automated plant phenotyping facilities, will help to screen large panels of genotypes  
42 and environmental conditions to identify the factors controlling the MGR.

43

44

45

46

47

48 **Five to eight key words**

49 Automated plant phenotyping, Image-analysis software, Arbuscular Mycorrhizal symbiosis,  
50 *Brachypodium distachyon*, nutrition, phosphate, nitrate, ammonium

51

52

53 **Introduction**

54 Arbuscular mycorrhiza (AM) is one of the most ancient plant-microorganism mutualist  
55 symbiosis that occurs between most plant species and Glomeromycota fungi. It is commonly  
56 accepted that AM can lead to a better plant growth (Smith & Read, 2008). The extended  
57 mycelium network in soil enables the fungi to uptake macro- and micronutrients in areas  
58 that are not exploited by plants roots. These nutrients are then transported through the  
59 mycelium to the roots and exchanged with plant metabolites (carbohydrates and lipids).  
60 Both nitrogen (N) and phosphorus (P), the most limiting nutrients for plant growth can be  
61 provided to plants (Pearson & Jakobsen, 1993; Tobar *et al.*, 1994; Smith *et al.*, 2004;  
62 Govindarajulu *et al.*, 2005; Fellbaum *et al.*, 2014). AM fungi have both nitrate and  
63 ammonium transporters and can thus uptake these two N-containing ions from the soil  
64 (reviewed in Chen *et al.*, 2018). Consequently AM plays a key role in plant nutrition in  
65 natural ecosystems and in low fertilization agricultural systems in which the soil N and P  
66 availability is often limiting for plant growth.

67 However, there is host and symbiont genetic variability for plant growth stimulation by AM  
68 fungi in controlled conditions. For example, mycorrhizal growth response (MGR) can be  
69 either positive or negative in wheat (Hetrick & Wilson, 1992; Xavier & Germida, 1998;  
70 Lehnert *et al.*, 2018) and sorghum (Watts-Williams *et al.*, 2019). Very little is known about  
71 the genetic determinants that control MGR. Identification of the underlying plant loci/genes  
72 is a major scientific challenge and would help to breed crops for improved MGR and  
73 increased performance in low fertilization agriculture.

74 Genetic studies to identify such loci/genes require high-throughput and accurate plant  
75 phenotyping in the presence or absence of the AM fungi. We test the feasibility of such  
76 genetic studies on *Brachypodium distachyon*, using an automated phenotyping platform (the  
77 “Toulouse Plant-Microbe Phenotyping” or “TPMP” facility).

78 *B. distachyon* is a wild Mediterranean diploid grass with a relatively small size and short cycle  
79 (Girin *et al.*, 2014). Variability of *B. distachyon* MGR to various AM fungal genotypes has  
80 been shown (Hong *et al.*, 2012) but host genetic effect on MGR has not been studied yet.

81 Effect of AM on plant growth is highly dependent on environmental conditions and in  
82 particular on nutrient availability in the soil. Plant colonization by AM fungi is also regulated

83 by nutrient availability (Bonneau *et al.*, 2013; Nouri *et al.*, 2014). Thus controlling soil  
84 nutrient availability is critical to study MGR. We used a two-compartment system, one of  
85 them being only accessible to AM fungi and supplemented with N and/or P, to mimic the  
86 ability of AM fungi to collect these nutrients in large soil volumes that cannot be explored by  
87 the plant root. A compartment only accessible to AM fungi was used to demonstrate N and P  
88 transport in plants using  $^{32}\text{P}/^{33}\text{P}$  or  $^{15}\text{N}$  (Pearson & Jakobsen, 1993; Tobar *et al.*, 1994; Smith  
89 *et al.*, 2004; Govindarajulu *et al.*, 2005; Fellbaum *et al.*, 2014). However, the effect of the  
90 nature and amount of nutrients in the compartment restricted to AM fungi, and particularly  
91 of combination of N and P, on MGR, remains to be determined.

92 Plant aboveground biomass can be estimated in a fast and non-destructive way by image  
93 analysis. In *B. distachyon*, this biomass was found to be well correlated with the shoot  
94 “biovolume” (Poire *et al.*, 2014).

95 Image segmentation can be performed by chaining various image processing tools in a  
96 pipeline. Creation of pipelines and/or adjustment of each tool parameters is required to set-  
97 up segmentation of images captured by camera on phenotyping platforms. There are many  
98 freely available Image processing libraries or programs, but to our knowledge none that has  
99 a user interface, can generate pipelines that can be rapidly tested on defined image subsets  
100 and apply the analysis pipelines on large amount of image data.

101 Here we describe an experimental system based on a two-compartment system allowing the  
102 measurement of *B. distachyon* MGR using a state-of-the-art high-throughput phenotyping  
103 facility. We show that both N and P mobilization by the AM fungi is critical for MGR in  
104 *B. distachyon* and that there is genetic variability in *B. distachyon* for MGR. We also provide a  
105 new Python-based software tool called “*IPSO Phen*”. This open-source tool allows to  
106 configure and test image processing tools embedded in pipelines that can be executed on  
107 large amount of images generated by automated plant phenotyping facilities.

## 108 **Results**

### 109 ***Access of AM fungi to nitrogen and phosphorus is required for positive mycorrhizal growth*** 110 ***response in B. distachyon***

111 Our first goal was to design an experimental system allowing measurement of MGR in *B.*  
112 *distachyon* grown in pots. To control the nutrient availability for the plant and the AM fungi,

113 we used a 1:1 (v/v) mixture of calcinated-clay and sand as substrate. To mimic the fact that  
114 *in natura* AM fungi can access nutrients that are not available to the plant roots, we use a  
115 two-compartment system. A plastic tube covered by a nylon mesh (hyphal compartment,  
116 HC), fine enough to exclude plant roots but not the AM fungal hyphae, was filled with  
117 calcinated-clay supplemented with N and/or P and placed at the bottom of 3L pots (Fig. 1a).  
118 Since N is a diffusible nutrient, part of the N can diffuse out of the HC and be accessible to  
119 plant roots. In order to limit this effect, we made sure that the total quantity of N introduced  
120 in the HC corresponds to the reported need for *B. distachyon* optimal growth (David *et al.*,  
121 2019). As P is not diffusible and would thus not leach out the HC, it was put in excess. When  
122 no N and P were supplemented in the HC, they were provided to the plants as phosphate  
123 directly mixed in the soil or nitrate through a nutritive solution.

124 In order to test the effect of N and/or P in the HC on *B. distachyon* growth, seedlings of the  
125 *B. distachyon* genotype Bd3-1 were inoculated with or without spores of the AM fungal  
126 species *Rhizophagus irregularis* and grown for 4 weeks in a growth chamber. Some plants  
127 were harvested to determine by microscopy the level of fungal colonization in roots. At 4  
128 weeks post inoculation (wpi), in average, 32% of each root system was colonized by AM  
129 fungi. No colonization was found in non-inoculated plants. The left over plants were grown  
130 for an extra 8 weeks in an automated greenhouse (Fig. S1a). At the end of the experiment  
131 (12 wpi), in average, 56% of each root system was colonized by AM fungi. Aboveground dry  
132 weights were also measured. A significant increase in Bd3-1 aboveground biomass was  
133 observed in mycorrhizal plants only when the HC was supplemented with a mixture of  
134 phosphate, ammonium and nitrate (Fig. 1b). Similar positive MGR on Bd3-1 was observed  
135 using sand alone as a substrate (Fig. S2).

136 This result shows that it is possible to establish a mutualistic symbiosis between *B.*  
137 *distachyon* genotype Bd3-1 and *R. irregularis* in controlled conditions, but only when AM  
138 fungi have access to a source of N and P.

139 ***“ISPO phen”, a Python-based software tool, enables a fast setup and test of image***  
140 ***processing pipelines for optimized segmentation and feature extraction***

141 Instead of measuring aboveground dry weight, we aimed to estimate plant aboveground  
142 biomass through image analysis. This required segmentation of the plant pixels over the

143 background. This can be easily done for a limited number of plants using freely-available  
144 analysis tools popular among the plant phenotyping community, namely ImageJ (Rueden *et*  
145 *al.*, 2017) and the Python based Scikit-image (van der Walt *et al.*, 2014), OpenCV (Bradski.  
146 2000) or PlantCV (Gehan *et al.*, 2017). However, users are required to adjust image  
147 processing tool settings individually and tests must be done manually, which is time  
148 consuming. The procedure of setting and testing pipeline items in sets containing large  
149 amount of images can easily become cumbersome. Plant high-throughput phenotyping  
150 generates large amount of image data. Here each plant is imaged daily (8 images with a 45°  
151 angle between each imaged, Fig. S1b) over a two-month period (60 days). Considering the  
152 264 pots as the maximal set up possible in the phenotyping greenhouse 2 of our facility (Fig.  
153 S1a), one such experiments could generate up to  $8 \times 60 \times 264 = 126\,720$  images. Our goal was  
154 to optimize the high-throughput segmentation of the plant pixels. Important features that  
155 we thought to be essential for this are the possibility to : (i) rapidly and semi-automatically  
156 test the solution space of given segmentation parameters, (ii) generate and test analysis  
157 pipelines, (iii) apply analysis pipelines on large amount of image data. As these features are  
158 not well served by the existing tools, we set out to develop “*IPSO phen*” a software built with  
159 Python using OpenCV, numpy (van der Walt *et al.*, 2011), pandas (McKinney, 2010) and  
160 Scikit-image. *IPSO phen* also includes a user interface, access to image database and the  
161 possibility to create or import new tools, including some tools already developed in PlantCV  
162 for instance. The *IPSO phen* documentation ([https://ipso-](https://ipso-phen.readthedocs.io/en/latest/installation.html)  
163 [phen.readthedocs.io/en/latest/installation.html](https://ipso-phen.readthedocs.io/en/latest/installation.html)) and the source code  
164 ([https://github.com/tpmp-inra/ipso\\_phen](https://github.com/tpmp-inra/ipso_phen)) are freely available.

165 Fig. 2a displays the flow chart that was defined and applied on the *B. distachyon* side images  
166 generated in this work. *IPSO Phen* can the save pipelines as Python scripts (see  
167 supplementary files: pipeline\_script.py or binary files: pipeline\_binary.tipp) that can be used  
168 to restore the process or be modified to better suite one’s needs.

### 169 ***Versatility of the “IPSO phen” segmentation pipeline for B. distachyon analysis***

170 An important feature of an image analysis process is that it has to be capable of both  
171 handling large amount of data and be sufficiently versatile to cope with variation in the  
172 image features and quality. To illustrate this we choose to present the segmentation  
173 performance of the developed *IPSO phen* pipeline on small plantlets (Fig. S3a), larger and

174 flowering plants (Fig. S3b), images with line errors (Fig. S3c) and images where misplacement  
175 of the covering foam disc (Fig S3d). The line errors are the result of data transfer issues  
176 between the camera and the database, can affect up to 10% of the images on some given  
177 days. The foam discs misplacement can be from the initial installation or appear during the  
178 experimentation and are quite rare event. Although not so common this could not be  
179 ignored and the coarse mask addressed the issue. The biomass of both small plantlets (initial  
180 stages of growth) and cases of data transfer error and disc misplacements could thus be  
181 managed by the analysis pipeline and return usable data points. The images of larger,  
182 flowering plants was not used in this work, but the pipeline could readily exploit  
183 characteristic features of this development stage.

184 The addition of the tutor cages on top of the pots was required to avoid any *B. distachyon*  
185 tillers from falling (which some genotype have a tendency for) but added an extra  
186 segmentation challenge, not only due to the division of plant part in sectors defined by the  
187 cage structure, but also bringing some extra light reflexion. These cages also mask plant  
188 material, with a more pronounced effect on smaller plants. In order to have the best  
189 segmentation, we applied different tools to several region of interest (ROI) of the image  
190 (step 3 of pipeline Fig. 2a).

191 ***B. distachyon* side image-determined "projected surface median" correlates with**  
192 ***aboveground shoot biomass***

193 We decided to calculate a proxy of plant shoot biomass by using side images. This proxy was  
194 generated for each plant imaging passage by calculating the median plant pixel number of 8  
195 images taken at consecutive 45° angles. To determine whether this plant "median projected  
196 surface" (MPS hereafter) provided by image analysis correlate with the plant biomass over  
197 the *B. distachyon* growth cycle, we harvested *B. distachyon* plants weekly and measured  
198 both the MPS from images and the actual biomass. We found a good correlation ( $R^2=0.975$ )  
199 between the aboveground MPS and the aboveground dry weight (Fig. 3). The correlation  
200 was lost once the spikelets appeared (Fig. S4), showing that the MPS is a good  
201 approximation of shoot but not seed biomasses.

202 ***Image analysis shows that mycorrhizal growth response in B. distachyon depends on plant***  
203 ***nutrition through AM fungi***

204 We then applied image segmentation and MPS calculation to follow the growth kinetic of  
205 Bd3-1 in presence or absence of AM fungi (Fig. 4a). To quantify the effect of AM fungi on  
206 growth, we measured the “area under the curve” (AUC) for each individual (Fig. 4b) we also  
207 calculated the MGR using the MPS at the end of the cycle (Fig. 4c). Better plant growth was  
208 observed in presence of AM fungi when N and P were added in the HC and plant N/P  
209 fertilization was low. In this condition, a significant difference in the AUC was found between  
210 mycorrhizal and the non-mycorrhizal plants (Fig. 4b), leading to a positive MGR (Fig. 4c).  
211 Analysis of plant MPS at each day of the kinetic showed that a significant difference between  
212 mycorrhizal and the non-mycorrhizal plants appeared 45 days after inoculation with AM  
213 fungi (17 days after addition of the HC in the experimental system). In contrast, no  
214 significant increase in growth of mycorrhizal plant compared to non-mycorrhizal plants, was  
215 observed when no N and P were added to the HC and N/P fertilization was low (Fig. 4a-c).  
216 Similarly, when N and P were added to the HC but plants were fertilized with high levels of N  
217 and P, no effect of AM fungi on plant growth was observed (Fig. 4a-c).

218 To determine whether there is genetic variability in *B. distachyon* for MGR and whether our  
219 experimental conditions allows to measure it, we initiated a screen *B. distachyon* genetic  
220 diversity for MGR. Differences were observed between the 16 genotypes tested ranging  
221 from positive to negative MGR (Fig. 5).

## 222 **Discussion**

223 Plant automated high throughput phenotyping enables to have more data points for a plant  
224 trait of interest compared to classical human-recording phenotyping. These can be more  
225 individuals as well as more time points. Moreover, the automated phenotyping platform,  
226 including the watering facility, allows to decrease the experimental variability within a given  
227 experiment. We would like to emphasize that we observed in this work a very low growth  
228 variability between plants with the same treatment within each replicate. Although not  
229 quantifiable as such, this variability was much lower compared to what we observed in  
230 various experiments we ran previously in growth chambers or greenhouses (although the  
231 plants were not grown under the exact same condition). However, we observed a strong  
232 variability between the first/second and the third replicates when we analyzed the  
233 *B. distachyon* genetic variability for MGR. For an unexplained reason, in the third replicate all  
234 genotypes started to flower during the 4 weeks the plants were in the growth chamber while



235 the first spikelets started to appear 1 week after transfer in the greenhouse in the two first  
236 replicates. This had a strong effect on MGR although the type of effect (positive or negative  
237 MGR) was similar between the replicates. Moreover, the early flowering plants had a  
238 reduced growth that affected the quality of image-segmentation with the imaging  
239 parameters we selected for our experiments (Fig. S6). Low variability of growth between  
240 individuals was also observed previously and led to the successful phenotyping of other  
241 plant-microbe interactions (Mazo-Molina *et al.*, 2019). We thus believe that the plant rearing  
242 conditions in the TPMP facility (Fig. S1a) are quite homogeneous, minimizing the biological  
243 variability.

244 We chose to estimate the shoot biomass only using side images, and not a combination of  
245 side and top images like (Poire *et al.*, 2014). This was mainly due to a phenotyping time  
246 consideration, as the top and side imaging can't run simultaneously (lighting conditions are  
247 different). Top imaging would have implied a second phenotyping job, not compatible with  
248 other experiments running on the facility at the same time. However, the correlation with  
249 biomass was similar to that found in (Poire *et al.*, 2014). Moreover, the use of the median  
250 pixel plant number has the advantage of being quite tolerant to accidental variations (for  
251 instance a tiller that would be blocked in the tutor cage).

### 252 ***IPSO Phen a new opensource software allowing the fast development of pipelines for plant*** 253 ***image segmentation***

254 In this work we have developed a new software suite that we believe is well suited to the  
255 analysis of large amount of image data, typically generated by high throughput plant  
256 phenotyping. The most popular open-source solutions for analyzing large plant-phenotyping  
257 data is PlantCV (Gehan *et al.*, 2017). The clear advantages of PlantCV are (i) the fact that it is  
258 built on known image-analysis toolkits like OpenCV or Scikit-image, whilst being (ii) easier to  
259 use than OpenCV (iii) its opensource nature, and (iv) large user community. We believe that  
260 *IPSO phen* could be a good addition/companion to PlantCV. Indeed *IPSO phen* fills the gap of  
261 known drawback of PlantCV as it provides (i) a User Interface, (ii) doesn't require one to be a  
262 Python programmer, (iii) provides the possibility to build and test image processing pipelines  
263 as they are being built. Like PlantCV, *IPSO phen* is built on industry standards (OpenCV,  
264 Scikit-image, numpy and pandas), it is easily extendable as new tools and plugins can be  
265 created and/or added from known sources. We have imported popular PlantCV tools within

266 the tool kit available in *IPSO phen*, these tools (by convention; named PCV in *IPSO phen*), can  
267 readily be integrated and tested in any new pipeline. A grid search, allows to explore a wide  
268 solution space in a very simple way, with easy inspection and selection by the user of the  
269 desired tool settings. Finally, in our experiments, imaging was performed daily and the raw  
270 images were stored in a dedicated database (not discussed in this work). *IPSO phen*  
271 software also has the advantage to directly access the desired images in the database. In  
272 conclusion, *IPSO phen* is meant to be used for high throughput as it connects directly with  
273 image databases (or filesystem), the pipeline functions can be tested on fixed or random sets  
274 of images at every step and the mass processing can be done in various steps.

275 *IPSO phen* is fully functional, but still in its early development. A roadmap for the future  
276 would be an improvement of the User Interface and a more flexible and intuitive pipeline  
277 builder.

### 278 ***Co-transport of N and P might be required for efficient mycorrhizal growth response in*** 279 ***B. distachyon***

280 In our controlled conditions, *B. distachyon* growth stimulation by AM fungi was observed  
281 only when N and P were added in the HC accessible to the AM fungi. This suggests that the  
282 growth stimulation is due to plant N and P nutrition through the AM fungi. It has to be noted  
283 that the growth of *B. distachyon* was similar when N and P were transported through AM  
284 fungi (+ AM fungi, fertilization with low N and P in the pot) or directly acquired by the root  
285 system (- AM fungi, fertilization with high N and P in the pot). The lack of *B. distachyon*  
286 growth increase between the conditions in which N and P were added or not in the HC in  
287 absence of AM fungi suggests that diffusion of at least one of the two nutrients is limited. The  
288 requirement of the presence of both N and P in the HC for positive MGR in *B. distachyon* was  
289 a surprising result. Indeed, positive MGR on maize was observed by introducing only P to the  
290 HC (Gerlach *et al.*, 2015). However, it might explain the absence or negative MGR observed  
291 in many experimental systems used in controlled conditions even if P transport from the HC  
292 to the plants was measured (Smith *et al.*, 2004; Li *et al.*, 2006). In our experimental system,  
293 when either only N or P were added in the HC, the other nutrient was added to the substrate  
294 outside of the HC and thus accessible to both AM fungi and roots. The lower plant growth  
295 compared to the condition in which both nutrients were added to the HC or directly in the  
296 substrate, suggests that uptake of both nutrients is inefficient if not performed through the

297 same mechanism (direct uptake or through AM fungi). It has been hypothesized that N and P  
298 can be co-transported in the AM fungal mycelium from the place they are collected to the  
299 arbuscules in plant roots. N is transported as arginine and P as polyphosphate, and arginine  
300 can bind to polyphosphate (Govindarajulu *et al.*, 2005). Stoichiometry of N and P in the  
301 mycelium might thus affect efficiency of their transport. Alternatively, colonization of plants  
302 by AM fungi can strongly repress expression of phosphate, nitrate and ammonium  
303 transporters involved in direct nutrient uptake, including in *B. distachyon* (Hong *et al.*, 2012).  
304 The P availability in the soil also interferes with N uptake and AM-dependent regulation of N  
305 transporters (Nouri *et al.*, 2014). It could be that colonization by AM fungi induces repression  
306 of direct nutrient uptake even if the AM fungi cannot provide all limiting nutrients for plant  
307 growth. It should be determined to which extent availability of N, P or N+P in the HC affects  
308 the direct uptake of both N and P.

309 Genes coding for both nitrate and ammonium transporters are found in AM fungi (reviewed  
310 in Chen *et al.*, 2018). When in competition with nitrate, ammonium (provided as ammonium  
311 nitrate in the HC) appeared to be the preferred N source for AM fungi, both in terms of  
312 uptake by AM fungi and delivery to plants (Tanaka & Yano, 2005). However, when only  
313 nitrate or ammonium were used as N sources (both for plant and AM fungi), better N  
314 transport by AM fungi to plants was obtained with nitrate (Hawkins & George, 2001). The  
315 authors suggested that pure ammonium can be deleterious for AM fungi. In our  
316 experimental conditions, we found a positive MGR if ammonium and nitrate were added  
317 together with P in the HC but not if only ammonium was added together with P, suggesting  
318 that a balance between ammonium and nitrate is required for efficient N uptake by AM  
319 fungi.

320 We observed positive MGR on the *B. distachyon* genotype Bd3-1 from 45 days after  
321 inoculation and 17 days after addition of the HC. Once the HC was added to the pots, it  
322 might take a few days for AM mycelium to reach the HC and start to uptake the nutrients it  
323 contains. We have not observed significant growth depression in the mycorrhizal plants  
324 before the AM fungi reach the HC and can provide a nutritional benefit. This suggests that in  
325 our conditions the carbon cost of AM establishment is not limiting for plant growth or is  
326 compensated by an increase of plant photosynthetic activity.

327 Here we show that AM fungi can stimulate the increase of *B. distachyon* shoot biomass. It  
328 would be interesting to determine which other plant traits are affected during AM. Image  
329 analysis can easily determine additional aboveground plant traits such as height, width, and  
330 various features of the aboveground plant shape. Automatic analysis of other traits such as  
331 the tiller number or the flowering time would require development of new pipelines/tools.  
332 In addition, seed development would be another important trait to follow. It would be  
333 interesting to analyze whether any changes in imaging variables correlate with effects of AM  
334 fungi on seed quantity and/or quality and could be used as proxy to follow effects of AM on  
335 seed production.

336 Testing MGR in 16 *B. distachyon* genotype, we observed variability between genotypes,  
337 ranging from a positive to negative MGR. Reasons that can explain host genetic variability for  
338 MGR are not known. Differences in host efficiency to acquire N and P from AM fungi could  
339 be one of them. Alternatively, AM fungi induce plant defense (Güimil *et al.*, 2005; Campos-  
340 Soriano *et al.*, 2012; Watts-Williams *et al.*, 2019) and trade-off between plant growth and  
341 defense are known (reviewed in Karasov *et al.*, 2017). Differences in level of host defense  
342 induction by AM fungi might explain difference in MGR. The genetic variability observed in  
343 *B. distachyon* is similar to that observed in other species except in maize for which only  
344 positive MGR were found (Kaeppeler *et al.*, 2000; Sawers *et al.*, 2017). It is interesting to note  
345 that in maize, positive MGR was also found when only P was added in the HC. Together it  
346 suggests that both nutrition (direct nutrient uptake and/or through AM fungi) and MGR are  
347 different in maize and *B. distachyon* or other grass species.

348 Identification of plant loci/genes controlling MGR would be of interest to help breeding for  
349 optimized MGR. The experimental design we setup, the genetic variability we found in  
350 *B. distachyon* and the software we developed for high throughput image analysis make  
351 feasible analysis of MGR on large panels of *B. distachyon* accessions / recombinant lines and  
352 quantitative genetics allowing identification such gene/loci in this species.

## 353 **Materials and methods**

### 354 ***Plant growth conditions***

355 *Brachypodium distachyon* Bd3-1 was used for setting up the experimental system. Variability  
356 of mycorrhizal growth responses was tested on the other indicated genotypes. Seeds were

357 surface sterilized for 30 sec in 70% ethanol and for 5 minutes in 3.2% active chlorine bleach  
358 solution. Seeds were placed in agar plates and incubated at 1 week (Bd3-1, Bd21, and Bd21-  
359 3) or 4 weeks (the other genotypes) at 4° C. The seeds were germinated for 3 days at 25°C  
360 before planting.

361 Seedlings were planted in peat pots (Fig. S7a) filled with about 250 ml of a 1:1 (v/v) mix of  
362 calcinated clay (Attapulgit Sorbix) and quartz sand (0.7-1.3 mm) and inoculated with 2000  
363 spores of *Rhizophagus irregularis* DAOM 197198 (Agronutrition, France).

364 Plantlets were grown for 4 weeks in a growth chamber (16h of light, LED light at 300  $\mu\text{mol.m}^{-2}.\text{s}^{-1}$ ,  
365 24 °C - 8h of dark, 18 °C). Each pot was individually watered with the same volume of a  
366 low N and P nutritive solution 3 times per week (Table S1). After 4 weeks, each peat pot was  
367 placed in a 3L plastic pot (3LSX, Bleu EK, Soparco, France) filled with the same substrate. A 40  
368 ml plastic container filled with the calcinated clay and covered by a 30  $\mu\text{m}$  nylon mesh was  
369 used as hyphal compartment (HC). The HC was supplemented with 305mg of  $\text{NH}_4\text{Cl}$ , 577mg  
370 of  $\text{KNO}_3$ , or 130 mg of  $\text{KNO}_3$ +177 mg of  $\text{NH}_4\text{NO}_3$  (each condition corresponding to 80 mg of  
371 N) and/or 115 mg of  $\text{KH}_2\text{PO}_4$ . The HC was placed at the bottom of the 3L pots. For the high N  
372 and P condition, 25ml of the N solution (10 mM  $\text{KNO}_3$  and 10 mM  $\text{Ca}(\text{NO}_3)_2$ ) were added  
373 weekly and/or 115mg of  $\text{KH}_2\text{PO}_4$  were mixed with the substrate used to fill the 3L pots, once  
374 the 3L pots were loaded on the automated greenhouse. A blue foam disc (eva/rubber  
375 composition, 210  $\text{g.m}^{-2}$ , 2mm thick, uniform blue colour) was glued on the rim of the pots to  
376 facilitate image segmentation (Fig. S7b). These discs also have the advantage of guiding the  
377 watering flow towards the center of the pot and lowering water loss by soil evaporation. A  
378 blue tutor cage (Sopafix 19 BAS, Bleu EK, Soparco, France) was attached on each pot to  
379 maintain all plant tillers upwards and thus allow more reproducible plant imaging (Fig. S7c).  
380 Plants were grown on the automated greenhouse (Fig. S7d) with watering three times per  
381 week with 8 ml of 2.5x nutritive solution (Table S1). Additional water was added to maintain  
382 each pot at a fixed weight corresponding to 70% of the maximal water retention capacity.

383 For measuring the correlation between image analysis and aboveground dry weight, Bd3-1  
384 seedling were planted on potting soil (SB2, Proveen, The Netherlands) supplemented with  
385 1.7g/L of osmocote (12-7-19+TE) and grown on the automated greenhouse. Four plants  
386 were harvested weekly.

## 387 ***IPSO phen***

388 The documentation files are available through readthedocs ([https://ipso-](https://ipso-phen.readthedocs.io/en/latest/installation.html)  
389 [phen.readthedocs.io/en/latest/installation.html](https://ipso-phen.readthedocs.io/en/latest/installation.html)) and contains all the details and explanation  
390 of how to install and use *IPSO phen*. The software was built using OpenCV (Gehan *et al.*,  
391 2017), numpy (van der Walt *et al.*, 2011), pandas (McKinney, 2010) and Scikit-image (van der  
392 Walt *et al.*, 2014). The source files are available through Github ([https://github.com/tpmp-](https://github.com/tpmp-inra/ipso_phen)  
393 [inra/ipso\\_phen](https://github.com/tpmp-inra/ipso_phen)). *IPSO phen* was created to (i) have a user interface, (ii) build for high  
394 throughput (image database connection, functions can be tested at each step, mass process  
395 in various steps) (iii) new tools/plugins can be added or built (declarative UI building,  
396 callbacks handled behind the scene, documentation and docstrings built automatically), (iv)  
397 Grid search to explore solution space in single process. Specific inquiries can be made using  
398 the dedicated email address: [ipsophen@inra.fr](mailto:ipsophen@inra.fr)

## 399 ***Data analyses***

400 Growth curve regressions were calculated using `geom_smooth` from R's tidyverse library  
401 with method "loess" and "y ~ x" formula. Areas under the curves were measured using the  
402 script `audpc` in the R library `agricolae`. Statistical differences in the aboveground dry weights,  
403 plant MPS at the fixed days or AUC were analyzed using a Kruskal Wallis test ( $p < 0.05$ ).

## 404 **Acknowledgements**

405 Seeds were kindly provided by Richard Sibout (INRA, France) and John Vogel (DOE-JGI, USA).

## 406 **Author contributions**

407 BL and NP designed and planned the experiments. FMM designed and created *IPSO phen*  
408 software. CR, LB, MG, MK, FD performed the experiments. FMM, NP and BL analyzed the  
409 data. FMM, NP and BL wrote the manuscript.

410 **Funding information**: This work was supported by the "Laboratoire d'Excellence (LABEX)"

411 TULIP (ANR-10-LABX-41) and by the Institut carnot "Plant2Pro" (contracts STRESSNSYM and  
412 PHENOR).

## 413 **Supporting Information :**

- 414 **Fig. S1.** Phenotyping system design.
- 415 **Fig. S2.** AM fungi access to N and P is required to stimulate Bd3-1 growth of in controlled  
416 conditions.
- 417 **Fig. S3.** *IPSO phen* pipeline versatility.
- 418 **Fig. S4.** *B. distachyon* seed biomass cannot be estimated by side image segmentation.
- 419 **Fig. S5.** Growth of 16 *B. distachyon* genotypes in presence or absence of *R. irregularis*.
- 420 **Fig. S6.** Normalized growth of 16 *B. distachyon* genotypes in presence or absence of *R.*  
421 *irregularis*.
- 422 **Fig. S7.** Experimental system design.
- 423 **Supplementary file 1:** pipeline\_script.py
- 424 **Supplementary file 2:** pipeline\_binary.tipp

425 **References**

- 426 **Bonneau L, Huguet S, Wipf D, Pauly N, Truong HN. 2013.** Combined phosphate and nitrogen  
427 limitation generates a nutrient stress transcriptome favorable for arbuscular  
428 mycorrhizal symbiosis in *Medicago truncatula*. *New Phytol* **199**: 188-202.
- 429 **Bradski G. 2000.** The opencv library. *Doctor Dobbs Journal* **25**:120-126
- 430 **Campos-Soriano L, Garcia-Martinez J, Segundo BS. 2012.** The arbuscular mycorrhizal  
431 symbiosis promotes the systemic induction of regulatory defence-related genes in  
432 rice leaves and confers resistance to pathogen infection. *Mol Plant Pathol* **13**: 579-  
433 592.
- 434 **Chen A, Gu M, Wang S, Chen J, Xu G. 2018.** Transport properties and regulatory roles of  
435 nitrogen in arbuscular mycorrhizal symbiosis. *Semin Cell Dev Biol* **74**: 80-88.
- 436 **David LC, Girin T, Fleurisson E, Phommabouth E, Mahfoudhi A, Citerne S, Berquin P, Daniel-  
437 Vedele F, Krapp A, Ferrario-Méry S. 2019.** Developmental and physiological  
438 responses of *Brachypodium distachyon* to fluctuating nitrogen availability. *Sci Rep* **9**:  
439 3824.
- 440 **Fellbaum CR, Mensah JA, Cloos AJ, Strahan GE, Pfeiffer PE, Kiers ET, Bücking H. 2014.** Fungal  
441 nutrient allocation in common mycorrhizal networks is regulated by the carbon  
442 source strength of individual host plants. *New Phytol* **203**: 646-656.
- 443 **Gehan MA, Fahlgren N, Abbasi A, Berry JC, Callen ST, Chavez L, Doust AN, Feldman MJ,  
444 Gilbert KB, Hodge JG, et al. 2017.** PlantCV v2: Image analysis software for high-  
445 throughput plant phenotyping. *PeerJ* **5**: e4088.
- 446 **Gerlach N, Schmitz J, Polatajko A, Schluter U, Fahnenstich H, Witt S, Fernie AR, Uroic K,  
447 Scholz U, Sonnewald U, et al. 2015.** An integrated functional approach to dissect  
448 systemic responses in maize to arbuscular mycorrhizal symbiosis. *Plant Cell Environ*  
449 **38**: 1591-1612.
- 450 **Girin T, David LC, Chardin C, Sibout R, Krapp A, Ferrario-Méry S, Daniel-Vedele F. 2014.**  
451 *Brachypodium*: a promising hub between model species and cereals. *J Exp Bot* **65**:  
452 5683-5696.
- 453 **Govindarajulu M, Pfeiffer PE, Jin H, Abubaker J, Douds DD, Allen JW, Bücking H, Lammers  
454 PJ, Shachar-Hill Y. 2005.** Nitrogen transfer in the arbuscular mycorrhizal symbiosis.  
455 *Nature* **435**: 819-823.
- 456 **Güimil S, Chang HS, Zhu T, Sesma A, Osbourn A, Roux C, Ioannidis V, Oakeley EJ, Docquier  
457 M, Descombes P, et al. 2005.** Comparative transcriptomics of rice reveals an ancient  
458 pattern of response to microbial colonization. *Proc Natl Acad Sci U S A* **102**: 8066-  
459 8070.
- 460 **Hawkins HJ, George E. 2001.** Reduced N-15-nitrogen transport through arbuscular  
461 mycorrhizal hyphae to *Triticum aestivum* L. supplied with ammonium vs. nitrate  
462 nutrition. *Annals of Botany* **87**: 303-311.
- 463 **Hetrick BAD, Wilson GWT. 1992.** Mycorrhizal dependence of modern wheat cultivars and  
464 ancestors: A synthesis. *Can J Bot* **70**: 2032-2040.
- 465 **Hong JJ, Park YS, Bravo A, Bhattarai KK, Daniels DA, Harrison MJ. 2012.** Diversity of  
466 morphology and function in arbuscular mycorrhizal symbioses in *Brachypodium*  
467 *distachyon*. *Planta* **236**: 851-865.
- 468 **Kaeppeler SM, Parke JL, Mueller SM, Senior L, Stuber C, Tracy WF. 2000.** Variation among  
469 maize inbred lines and detection of quantitative trait loci for growth at low



- 470 phosphorus and responsiveness to arbuscular mycorrhizal fungi. *Crop Science* **40**:  
471 358-364.
- 472 **Karasov TL, Chae E, Herman JJ, Bergelson J. 2017.** Mechanisms to Mitigate the Trade-Off  
473 between Growth and Defense. *Plant Cell* **29**: 666-680.
- 474 **Lehnert H, Serfling A, Friedt W, Ordon F. 2018.** Genome-Wide Association Studies Reveal  
475 Genomic Regions Associated With the Response of Wheat. *Front Plant Sci* **9**: 1728.
- 476 **Li HY, Smith SE, Holloway RE, Zhu YG, Smith FA. 2006.** Arbuscular mycorrhizal fungi  
477 contribute to phosphorus uptake by wheat grown in a phosphorus-fixing soil even in  
478 the absence of positive growth responses. *New Phytol* **172**: 536-543.
- 479 **Mazo-Molina C, Mainiero S, Hind S, Kraus C, Vachev M, Maviane-Macia F, Lindeberg M,  
480 Saha S, Strickler S, Feder A, et al. 2019.** The Ptr1 Locus of *Solanum lycopersicoides*  
481 Confers Resistance to Race 1 Strains of *Pseudomonas syringae* pv. tomato and to  
482 *Ralstonia pseudosolanacearum* by Recognizing the Type III Effectors AvrRpt2 and  
483 RipBN. *Mol Plant Microbe Interact* **32**: 949-960.
- 484 **McKinney W. 2010.** Data structures for statistical computing in python. In: Proceedings of  
485 the 9th Python in Science Conference. SciPy Austin, TX. 51-56
- 486 **Nouri E, Breuillin-Sessoms F, Feller U, Reinhardt D. 2014.** Phosphorus and nitrogen regulate  
487 arbuscular mycorrhizal symbiosis in *Petunia hybrida*. *PLoS One* **9**: e90841.
- 488 **Pearson J, Jakobsen I. 1993.** The relative contribution of hyphae and roots to phosphorus  
489 uptake by arbuscular mycorrhizal plants, measured by dual labeling with P-32 AND P-  
490 33. *New Phytol* **124**: 489-494.
- 491 **Poire R, Chochois V, Sirault XRR, Vogel JP, Watt M, Furbank RT. 2014.** Digital imaging  
492 approaches for phenotyping whole plant nitrogen and phosphorus response in  
493 *Brachypodium distachyon*. *J Integr Plant Biol* **56**: 781-796.
- 494 **Rueden CT, Schindelin J, Hiner MC, DeZonia BE, Walter AE, Arena ET, Eliceiri KW. 2017.**  
495 ImageJ2: ImageJ for the next generation of scientific image data. *BMC Bioinformatics*  
496 **18**: 529.
- 497 **Sawers R, Svane S, Quan C, Gronlund M, Wozniak B, Gebreselassie M, Gonzalez-Munoz E,  
498 Montes R, Baxter I, Goudet J, et al. 2017.** Phosphorus acquisition efficiency in  
499 arbuscular mycorrhizal maize is correlated with the abundance of root-external  
500 hyphae and the accumulation of transcripts encoding PHT1 phosphate transporters.  
501 *New Phytol* **214**: 632-643.
- 502 **Smith S, Read D. 2008.** Mycorrhizal Symbiosis, 3rd Edition. *New York: Academic Press.*: 1-  
503 787.
- 504 **Smith S, Smith F, Jakobsen I. 2004.** Functional diversity in arbuscular mycorrhizal (AM)  
505 symbioses: the contribution of the mycorrhizal P uptake pathway is not correlated  
506 with mycorrhizal responses in growth or total P uptake. *New Phytol* **162**: 511-524.
- 507 **Tanaka Y, Yano K. 2005.** Nitrogen delivery to maize via mycorrhizal hyphae depends on the  
508 form of N supplied. *Plant Cell Environ* **28**: 1247-1254.
- 509 **Tobar R, Azcon R, Barea J. 1994.** Improved nitrogen uptake and transport from N-15-labeled  
510 nitrate by external hyphae of arbuscular mycorrhiza under water-stressed conditions.  
511 *New Phytol* **126**: 119-122.
- 512 **van der Walt S, Colbert S, Varoquaux G. 2011.** The NumPy Array: A Structure for Efficient  
513 Numerical Computation. *Comput Sci Eng* **13**: 22-30.
- 514 **van der Walt S, Schönberger JL, Nunez-Iglesias J, Boulogne F, Warner JD, Yager N, Guillard  
515 E, Yu T, contributors s-i. 2014.** scikit-image: image processing in Python. *PeerJ* **2**:  
516 e453.

- 517 **Watts-Williams SJ, Emmett BD, Levesque-Tremblay V, MacLean AM, Sun X, Satterlee JW,**  
518 **Fei Z, Harrison MJ. 2019.** Diverse Sorghum bicolor accessions show marked variation  
519 in growth and transcriptional responses to arbuscular mycorrhizal fungi. *Plant Cell*  
520 *Environ* **42**: 1758-1774.
- 521 **Xavier LJC, Germida JJ. 1998.** Response of spring wheat cultivars to Glomus clarum NT4 in a  
522 P-deficient soil containing arbuscular mycorrhizal fungi. *Can J Soil Sci* **78**: 481-484.

523 **Figure legends**

524 **Figure 1. AM fungi access to N and P is required to stimulate Bd3-1 growth of in controlled**  
525 **conditions.** a) Schematic representation of the experimental system. One plant was grown  
526 per 3L pot. A tube separated by a nylon mesh (hyphal compartment, HC, red) and containing  
527 various sources of N and/or P nutrients was placed at the bottom de the 3L pot. AM fungi  
528 (orange) but not the roots (black) accessed to the N and P in the HC. b) Indicated N or P  
529 ( $\text{KH}_2\text{PO}_4$ ) sources were put in the HC. Plant aboveground parts were harvested 12 wpi and  
530 dry weight (DW) were measured. Mycorrhizal Growth Response (MGR) was calculated as  
531 (mean DW of inoculated plants – mean DW of non-inoculated plants) / mean DW of non-  
532 inoculated plants. \* indicates a significant difference in DW between inoculated and non-  
533 inoculated plants. n=4 individuals (from one biological replicate).

534

535 **Figure 2: IPSO phen allows fast creation of pipelines to estimate *B. distachyon***  
536 **aboveground biomass from side view images.** a) Schematic representation of the pipeline  
537 used for *B. distachyon* image segmentation. b) Example of image processing at various steps  
538 of the pipeline (only steps 1, 2, 4, 5, 8 and 9 are illustrated). Numbers correspond to the step  
539 indicated in a). 1: **source image**, presence of a surrounding tutor cage, presence of reflection  
540 and diffraction noise. 2: **white balance and exposure**. This will fix any white balance or  
541 exposure errors that occurred during acquisition and will simplify comparisons as all images  
542 will have the same settings. 3: **Regions of interest (ROI)**, this can be done manually or  
543 automatically, the types of ROI used here were the following: (i) keep ROI, everything  
544 outside will be deleted. (ii) safe ROI, contours inside this section won't be treated as strictly  
545 as those outside. (iii) open ROI, a morphology open operation (erode + dilate) will be applied  
546 inside. (iv) enforcer ROI, checks that the object is where it's supposed to be. 4: any  
547 **transformations** that renders segmentation easier, for this analysis we choose to replace the  
548 colour of darker and lighter as well as dominantly blue zones. Modification made at this step  
549 are not considered when images features are extracted 5: building **coarse masks**; in this  
550 pipeline a maximum of three coarse masks are needed: a mask to remove the tutor cage, a  
551 mask to remove the background, and another to remove the sensor noise. 6: **Merge Masks**,  
552 coarse masks as merged using logical operators "AND", or "OR" depending on the mask. 7:  
553 **Apply ROIs**, "keep", "delete" and "morphology" ROIs are applied at this step. 8: **Clean**

554 **Coarse mask**, clean the coarse mask defined at step 5. 9: **extract features** according to the  
555 phenotyping question, here the projected plant pixels of each angle/image. For more  
556 information, see readthedocs (<https://ipso-phen.readthedocs.io/en/latest/installation.html>).

557

558 **Figure 3. *B. distachyon* aboveground shoot biomass can be estimated by side image**  
559 **segmentation.** Plot of the aboveground MPS and dry weights. The MPS is the median of the  
560 plant pixel number obtained from the 8 images taken with 45° angles. Plants were harvested  
561 weekly and the MPS was determined on images taken immediately before harvesting.

562

563 **Figure 4. Image segmentation allows to measure mycorrhizal growth response in Bd3-1.** a)  
564 Growth curves of Bd3-1 in presence (+AMF) or absence (-AMF) of *R. irregularis* grown in pots  
565 with HC containing N and P (+NP) or not (-NP). Plants were fertilized with low levels of N and  
566 P (LNP) or high levels of N and P (HNP). n=4 individuals (from one biological replicate). b)  
567 Differences in growth were quantified as areas under the curves (AUC). Different letters  
568 represent statistically different categories. c) Mycorrhizal Growth Response (MGR) was  
569 calculated using the plant MPS at the end of the growth as (mean MPS of inoculated plants –  
570 mean MPS of non-inoculated plants) / mean MPS of non-inoculated plants.

571

572 **Figure 5. Image segmentation allows to screen *B. distachyon* genetic variability for**  
573 **mycorrhizal growth responses.** Plants were grown in presence or absence of *R. irregularis*  
574 grown in pots with HC containing N and P and were fertilized with low levels of N and P. n=3  
575 individuals (from 3 biological replicates). Mycorrhizal Growth Response (MGR) was calculated  
576 as  $\log_{10}$  (MPS of inoculated plants / MPS of non-inoculated plants) in each biological  
577 replicate using the plant MPS at the end of the growth. Triangles, Dots and squares  
578 represent MGR in biological replicate 1, 2 and 3 respectively.

**(a)**

Fertilization :

N and/or P  
accessible to  
plants and  
AM fungi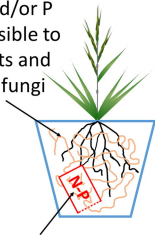

HC: N and/or P only accessible to AMF

**(b)**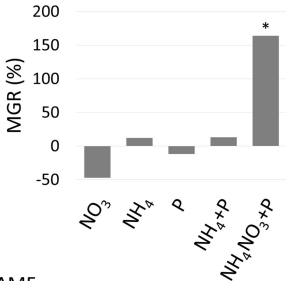

Figure 1

(a)

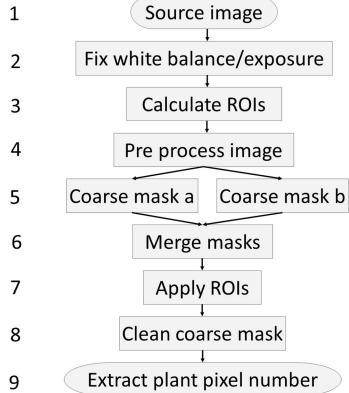

(b)

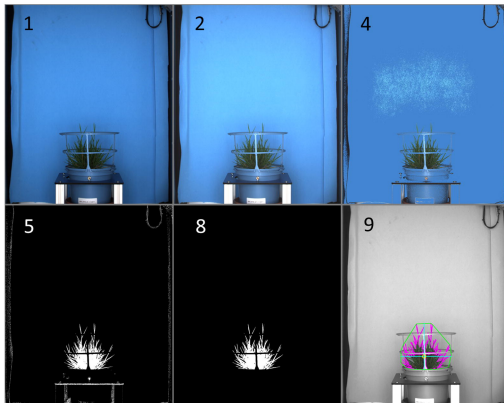

Figure 2

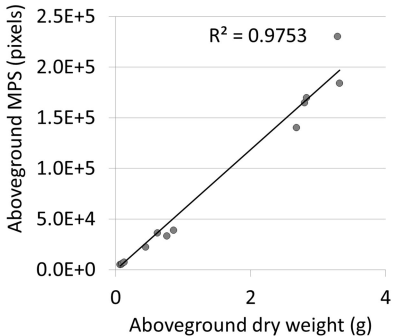

Figure 3

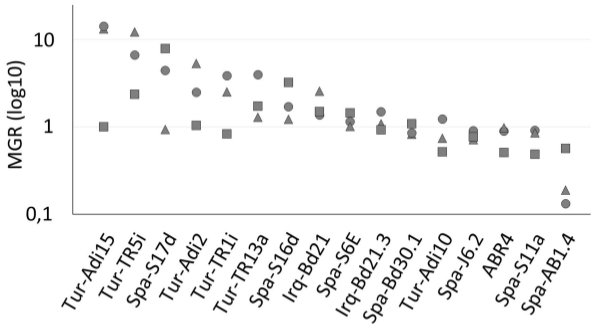

Figure 5



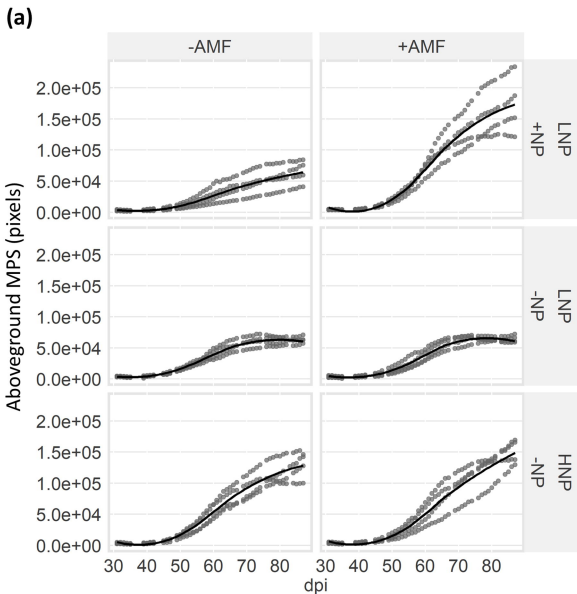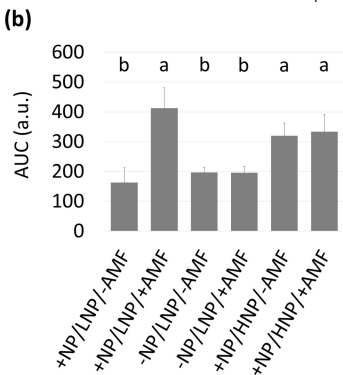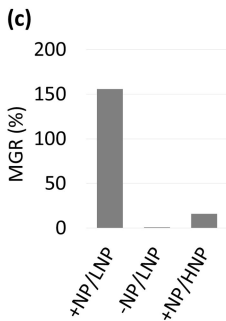

Figure 4
